# Supplementary material for: An association between maternal weight change in the year before pregnancy and infant birth weight: ELFE, a French national birth cohort study
Source: PubMed Central journal article supplement (PMC6701747; doi:10.1371/journal.pmed.1002871), 2019-08-20
Supplement: pmed.1002871.s004.pdf [file pmed.1002871.s004.pdf]

**MATERNITY UNIT SURVEY**  
**Administered in 2011**  
**MEDICAL FILE DATA**

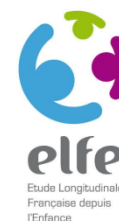

Data collected face-to-face  
 Questionnaire for of-age mothers of children born at 33 weeks or more  
 (single or twin births)

**Greyed-out questions must absolutely be completed**

**UPD** Updates (constructed variables and corrected variables) are included at the end of the chapter, indicated by this symbol.

## CONTENTS

|                                                    |    |
|----------------------------------------------------|----|
| GENERAL INFORMATION .....                          | 2  |
| PREGNANCIES .....                                  | 3  |
| PRIOR PATHOLOGIES .....                            | 5  |
| INFECTIOUS PATHOLOGIES, SCREENING, TREATMENT ..... | 6  |
| OTHER PATHOLOGIES AND COMPLICATIONS .....          | 11 |
| PRENATAL IMAGING AND DIAGNOSIS .....               | 13 |
| DELIVERY .....                                     | 16 |
| CHILD .....                                        | 19 |
| TRANSFER .....                                     | 24 |
| TRANSFERRED CHILD: PATHOLOGIES .....               | 29 |
| TRANSFERRED CHILD: DIET, OTHER INFORMATION .....   | 36 |

## GENERAL INFORMATION

**<DMNIE>**

Medical data ID:

|\_|\_|\_|\_|\_|\_|\_|

**DM**

DM questionnaire available

0 Unavailable

1 Available

**<DMUSERNAME>**

Interviewer ID: \_\_\_\_\_

**\*DMCREATION**

Date created .....

|\_|\_|\_|\_|\_|\_|\_|

**\*TRMOTABSQ**

Reason for absence of questionnaire: \_\_\_\_\_

## PREGNANCIES

**NGROSS**

Total number of pregnancies (not including current pregnancy) |\_|\_|

*If NGROSS>0:*

**NACC**

Number of births (not including current birth)..... |\_|\_|

**NMORTNE**

Number of stillbirths: |\_|\_|

**NDNEONAT**

Number of neonatal deaths (between 0 and 27 days) |\_|\_|

**NPREMA**

Number of children born prematurely (<37 weeks) |\_|\_|

**NHYPOT**

Number of children born small for gestational age |\_|\_|

**GMULT**

Number of multiple pregnancies |\_|\_|

**ANTCESAR**

Previous caesarian births:

- 0 No
- 1 Yes
- 9 Doesn't know

**\*DREGLES**

Date of last period (dd/mm/yy) ... |\_|\_|\_|\_|\_|\_|\_|\_|

**\*DCONCEPC**

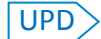

Start date of pregnancy (corrected) |\_|\_|\_|\_|\_|\_|\_|\_|

**JUMEAUX**

Expecting twins?

- 0 No
- 1 Yes
- 9 Doesn't know

**BIRTH ORDER**

Order of twin ..... |\_|\_|

**RANGALEA**

Order of twin (generated randomly, enabling random selection of one of the twins) |\_|\_|

23 / 05 / 2016

**TYPJUM**

**Is the twin pregnancy:**

1 Monochorionic/monoamniotic

2 Monochorionic/diamniotic

3 Dichorionic

4 Other

9 Doesn't know

*(Question asked starting from wave 2)*

## PRIOR PATHOLOGIES

### HTA

#### High blood pressure

- 0 No
- 1 Chronic HBP
- 2 HBP during a prior pregnancy only

### DIABETE

#### Diabetes

- 0 No
- 1 Type 1 (insulin dependent)
- 2 Type 2 (non insulin dependent)
- 3 Pregnancy-related diabetes (prior pregnancies)

### AUTPATHO

#### Other chronic or severe pathology/pathologies or handicap(s)

- 0 No
- 1 Yes
- 9 Doesn't know

If AUTPATHO=1

#### \*AUTPATHOP

Specify: \_\_\_\_\_

## INFECTIOUS DISEASES, SCREENING, TREATMENT

Blood analysis made between 3rd and 8th month (if several, choose first)

### HEMOGL

Haemoglobin (g/100 ml) (value between 5 and 25)

|\_|\_|\_|,|\_|

### HEMAT

Haematocrit % (value between 20 and 50)

|\_|\_|\_|,|\_|

### \*DBS

Date of analysis (dd/mm/yy)

|\_|\_|\_|\_|\_|\_|\_|\_|

⇒ See end of chapter for corrected variable and constructed variable: date of analysis in amenorrhoea days

### TOXO

Serological status relative to toxoplasmosis (result of last test made during pregnancy):

- 1 Lack of antibodies (seronegative woman)
- 2 Presence of IgMs (alone or together with specific IgGs)
- 3 Presence of specific IgGs (immunised woman)
- 4 Test not carried out due to known immunisation (positive test before pregnancy)
- 5 Test not carried out (unknown reason)
- 6 No information on test realisation or result

If TOXO≠1

### TRTTOXO

Treatment against toxoplasmosis

- 0 No
- 1 Spiramycin (Rovamycine®)
- 2 Pyrimethamine / Sulfamides (Malocide® + Adiazine® or Fansidar®)
- 3 Both
- 4 Treatment carried out but drug(s) non-specified
- 9 Not documented

If TRTTOXO>0

### DATETOXO

Treatment start date known?

- 0 No
- 1 Yes
- 9 Not documented

If DATETOXO=1

### \*DTRTTOXO

Specify:

|\_|\_|\_|\_|\_|\_|\_|\_|

⇒ See end of chapter for corrected variable and constructed variable: treatment start date in amenorrhoea days

## SEROCONV

### Seroconversion dating:

- 1 Documented seroconversion (positivation of serology of toxoplasmosis during the pregnancy)
- 2 Suspected infection acquired during the pregnancy
- 9 Not documented

*If SEROCONV=1*

#### \*DEXNTOXO

**Date of last negative examination** (dd/mm/yy)

|\_|\_|\_|\_|\_|\_|\_|\_|\_|

⇒ See end of chapter for corrected variable and constructed variable: date of last negative examination in amenorrhoea days

#### \*DEXPTOXO

**Date of last positive examination**(dd/mm/yy)

|\_|\_|\_|\_|\_|\_|\_|\_|\_|

⇒ See end of chapter for corrected variable and constructed variable: date of last positive examination in amenorrhoea days

*If SEROCONV=2*

#### \*DPTOXOSI

**Date of first positive examination (seroconversion undocumented)** (dd/mm/yy)

|\_|\_|\_|\_|\_|\_|\_|\_|\_|

⇒ See end of chapter for corrected variable and constructed variable: date of first positive examination in amenorrhoea days (seroconversion undocumented)

## CMV

**Serological status regarding CMV** (result of first test carried out during pregnancy)

- 1 Lack of antibodies (seronegative woman)
- 2 Presence of IgMs (alone or together with specific IgGs)
- 3 Presence of specific IgGs (immunised woman)
- 4 Test not carried out
- 5 No information

## AGHBSG

**Testing the mother for the HBs antigen during current pregnancy**

- 1 HBs Ag negative
- 2 HBs Ag positive
- 3 Test not carried out due to known HBs Ag before pregnancy
- 4 Test not carried out because woman vaccinated
- 5 Test not carried out, other reason (e.g. unmonitored pregnancy)
- 6 No information on test realisation or result

INT: IMPORTANT: THIS IS THE HBs Ag, NOT THE ANTI-HBs Ab

*If AGHBSG≠1*

#### AGHBSPN

**Testing for HBs Ag after birth:**

- 1 HBs Ag negative
- 2 HBs Ag positive
- 3 Test not carried out owing to known HBs Ag before pregnancy
- 4 Test not carried out because woman vaccinated
- 5 No information on test realisation or result
- 9 Not documented

If AGHBSPN≠1

**IGHBENF**

Was/were the child/children given anti-HBs immunoglobulins? (IM-LFB)

- 0 No
- 1 Yes
- 2 Unknown
- 9 Not documented

If IGHBENF=1

**\*DIGHBENF**

Date of injection (dd/mm/yy)

|\_|\_|\_|\_|\_|\_|\_|\_|\_|

⇒ See end of chapter for corrected variable and constructed variable: number of days between child birth date and corrected injection date

If AGHBSPN≠1

**VACCVHB**

Was/were the child/children vaccinated for HB (first dose)? (GenHevac B, Engenrix B10, HBvac Pro5)

- 0 No
- 1 Yes
- 2 Unknown
- 9 Not documented

If VACCVHB=1

**\*DVACCVHB**

Date of injection (dd/mm/yy)

|\_|\_|\_|\_|\_|\_|\_|\_|\_|

⇒ See end of chapter for corrected variable and constructed variable: number of days between child birth date and vaccination date

**DEPSYPHG**

Screening for syphilis (TPHA and VRDL) during pregnancy?

- 1 Yes, once
- 2 Yes, several times
- 3 No examination
- 4 No information on realisation or results of tests

If DEPSYPHG<3

**DEPIS**

Positive?

- 0 No
- 1 Yes
- 9 Doesn't know

If DEPIS=1

**TRTEXT**

Treated with Extencilline (injectable)?



- 0 No
- 1 Yes
- 2 Unknown
- 9 Doesn't know

*If DEPIS=1*

**SDEPSYPHG**

Pregnancy period in weeks of amenorrhoea

\_\_|\_\_|

**\*DBSC**

**UPD** Date of six-month examination (corrected)

|\_\_|\_\_|\_\_|\_\_|

\_\_|\_\_|

**DBSJR**

**UPD** (Constructed variable) Date of six-month examination in amenorrhoea days:

\_\_|\_\_|

Corrected date of six-month examination – conception date + 14

**\*DTRTTOXOC**

**UPD** Start date of toxoplasmosis treatment (corrected)

|\_\_|\_\_|\_\_|\_\_|\_\_|\_\_|

**DTRTTOXOJR**

**UPD** (Constructed variable) Start date of treatment in amenorrhoea days

\_\_|\_\_|

Start date of treatment – conception date + 14

**\*DEXNTOXOC**

**UPD** Date of last toxo examination (documented seroconversion) (corrected)

|\_\_|\_\_|\_\_|\_\_|\_\_|\_\_|

**DEXNTOXOJR**

**UPD** (Constructed variable) Date of last negative examination in amenorrhoea days

\_\_|\_\_|

Date of last negative examination – conception date + 14

**\*DEXPTOXOC**

**UPD** Date of first toxo + examination (documented seroconversion) (corrected)

|\_\_|\_\_|\_\_|\_\_|\_\_|\_\_|

**DEXPTOXOJR**

**UPD** (Constructed variable) Date of first toxo positive examination in amenorrhoea days

\_\_|\_\_|

Date of first positive examination – conception date + 14

**DPTOXOSIJR**

**UPD** (Constructed variable) Date of first toxo positive examination in amenorrhoea days (undocumented seroconversion)

\_\_|\_\_|

Date of first positive examination – conception date + 14

**\*DIGHBENFC**

**UPD** Date child injected with anti-HBs immunoglobulins (corrected)

|\_\_|\_\_|\_\_|\_\_|\_\_|\_\_|

**DIGHBENFJR**

**UPD** (Constructed variable) Number of days between date of birth and corrected date of anti-HBs immunoglobulins injection

\_\_|\_\_|

**\*DVACCVHBC**

**UPD** Date of HB vaccination (corrected)

|\_\_|\_\_|\_\_|\_\_|\_\_|\_\_|

DVACCVHBJR

UPD (Constructed variable) Number of days between date of birth and date of HB vaccination

|\_|\_|

## OTHER PATHOLOGIES AND COMPLICATIONS

### MAP

**Threat of premature delivery (repeated and painful uterine contractions and/or cervical modifications)**

- 0 No
- 1 Yes, having required hospitalisation
- 2 Yes, with outpatient treatment only (medicine and/or rest)

### RUPTMEMB

**Premature rupture of membranes (at least 12 hours before start of labour)**

- 0 No
- 1 Yes
- 9 Doesn't know  
(Question duplicated for twins)

*If RUPTMEMB=1*

#### \*DRUPTMEMB

**Date of rupture (dd/mm)**

|\_|\_|\_|\_|\_|

⇒ See end of chapter for corrected variable and constructed variable: Date of membrane rupture in amenorrhoea days

(Question duplicated for twins)

### HEMORR

**Haemorrhage in second or third trimester**

- 0 No
- 1 Placenta praevia
- 2 Retroplacental haematoma
- 3 Other

### HTAG

**High blood pressure developed during pregnancy (systolic  $\geq$  140 mmHg or diastolic  $\geq$  90 mmHg)**

- 0 No
- 1 Yes, with proteinuria ( $\geq$  0.3 g/l or per 24h)
- 2 Yes, without proteinuria

*If HTAG>0*

#### \*DHTAG

**Date at diagnosis (dd/mm)**

|\_|\_|\_|\_|\_|

⇒ See end of chapter for corrected variable and constructed variable: Date at HBP diagnosis in amenorrhoea days

*If HTAG>0*

### TRHTAG

**Treatment?**

- 0 No

23 / 05 / 2016

- 1 Yes
- 9 Not documented

**DIABGEST**

**Gestational diabetes**

- 0 No
- 1 Yes
- 9 Doesn't know

If DIABGEST=1

**DIABGESTP**

**Treatment?**

- 1 Insulin
- 2 Diet only
- 3 Not documented

**ANOPOI**

**Suspected foetal weight anomaly during pregnancy**

- 0 No anomaly
  - 1 Intra-uterine growth restriction (IUGR)
  - 2 Macrosomia
- (Question duplicated for twins)*

**CORTIC**

**Prenatal administration of corticosteroids for foetal maturation**

- 0 No
- 1 Yes
- 9 Doesn't know

If CORTIC=1

**\*DCORTIC**

**Date of first injection**

|\_|\_|\_|\_|\_|

⇒ See end of chapter for corrected variable and constructed variable: Date of first injection in amenorrhoea days

**NBCORTIC**

**Number of treatments** (1 treatment= several injections)

|\_|

**CORTICP**

**Corticosteroid administered**

- 1 Betamethasone
- 2 Dexamethasone
- 3 Other
- 9 Doesn't know

**\*DRUPTMEMBC**

**UPD** Date of membrane rupture (corrected)

|\_|\_|\_|\_|\_|

**DRUPTMEMBJR**

**UPD** (Constructed variable) Date of membrane rupture in amenorrhoea days

|\_|\_|

Date of membrane rupture (corrected) – conception date + 14

**\*DHTAGC**

**UPD** Date at HBP diagnosis (corrected) |\_|\_|\_|\_|

**DHTAGJR**

**UPD** (Constructed variable) Date at HBP diagnosis in amenorrhoea days |\_|\_|  
Date at HBP diagnosis (corrected) – conception date + 14

**\*DCORTICC**

**UPD** Date of first injection (corrected) |\_|\_|\_|\_|

**DCORTICJR**

**UPD** (Constructed variable) Date of first injection in amenorrhoea days |\_|\_|  
Date of first corticosteroid injection (corrected) – conception date + 14

**PRENATAL IMAGING AND DIAGNOSIS**

*(Duplicated for twins)*

**First-trimester ultrasound**

**ECHO1SEM**

Gestational age in amenorrhoea weeks |\_|\_|

**ECHO1JR**

Gestational age: days in addition to number of weeks |\_|\_|

**ECHO1CC**

Measurement of cranio-caudal (CC) length (mm) |\_|\_|\_|

**ECHO1LF**

Length of femur (LF) (mm) |\_|\_|\_|

**ECHO1DAT**

Transverse abdominal diameter (TAD) (mm) |\_|\_|\_|

**ECHO1CA**

If TAD unavailable, abdominal circumference (mm) |\_|\_|\_|

**ECHO1BIP**

Biparietal diameter (BPD) (mm) |\_|\_|\_|

**Second-trimester ultrasound**

**ECHO2SEM**

Gestational age in amenorrhoea weeks |\_|\_|

**ECHO2SEMJ**

Gestational age: days in addition to number of weeks

|\_|\_|

**ECHO2LF**

Length of femur (LF) (mm)

|\_|\_|\_|

**ECHO2DAT**

Transverse abdominal diameter (TAD) (mm)

|\_|\_|\_|

**ECHO2CA**

If TAD unavailable, abdominal circumference (mm)

|\_|\_|\_|

**ECHO2BIP**

Biparietal diameter (BPD) (mm)

|\_|\_|\_|

**Third-trimester ultrasound**

**ECHO3SEM**

Gestational age in amenorrhoea weeks

|\_|\_|

**ECHO3SEMJ**

Gestational age: days in addition to number of weeks

**ECHO3LF**

Length of femur (LF) (mm)

|\_|\_|\_|

**ECHO3DAT**

Transverse abdominal diameter (TAD) (mm)

|\_|\_|\_|

**ECHO3CA**

If TAD unavailable, abdominal circumference (mm)

|\_|\_|\_|

**ECHO3BIP**

Biparietal diameter (BPD) (mm)

|\_|\_|\_|

Have any of the following examinations been made?

**AMNIO**

Amniocentesis

0 No

1 Yes

2 Unknown

9 Doesn't know

**BIOPSY**

Trophoblast biopsy

0 No

1 Yes

2 Unknown

9 Doesn't know

**PRELEVSF**

**Foetal blood sample**

- 0 No
- 1 Yes
- 2 Unknown
- 9 Doesn't know

*If AMNIO=1 or BIOPSIE=1 or PRELEVSF=1 (one of the examinations has been made)*

**MOTEXAM**

**For what reason?**

- 1 Maternal age alone
- 2 Nuchal translucency
- 3 Another ultrasound warning sign
- 4 Blood test
- 5 Integrated risk (nuchal translucency + blood test)
- 6 Another reason, code and specify
- 9 Doesn't know

*If MOTEXAM=6*

**\*MOTEXAMP Specify** \_\_\_\_\_

*If AMNIO=1 or BIOPSIE=1 or PRELEVSF=1 (one of the examinations has been made)*

**Has the examination led to:**

**ANOCONG**

**The diagnosis of a congenital anomaly**

- 0 No
- 1 Yes
- 2 Unknown
- 9 Doesn't know

**TOXOCONG**

**The diagnosis of a congenital toxoplasmosis**

- 0 No
- 1 Yes
- 2 Unknown
- 9 Doesn't know

**CMVCONG**

**The diagnosis of a CMV congenital infection**

- 0 No
- 1 Yes
- 2 Unknown
- 9 Doesn't know

## DELIVERY

### Gestational age at delivery

#### AGEGESTS

Weeks

\_\_

#### AGEGESTJ

Days

\_\_

#### PRESENT

##### Type of birth

1 Cephalic

2 Breech

3 Other

9 Doesn't know

*(Question duplicated for twins)*

#### DEBTRAV

##### Start of labour

1 Spontaneous labour

2 Induced *(including cervical ripening alone)*

3 Caesarean before start of labour

*If DEBTRAV>1*

##### Reasons

#### MOTTRAV\_1

##### Intra-uterine growth restriction

0 No

1 Yes

9 Doesn't know

#### MOTTRAV\_2

##### Severe foetal distress (IUGR anomaly, reduced foetal movements, anomaly with umbilical or cerebral dopplers)

0 No

1 Yes

9 Doesn't know

#### MOTTRAV\_3

##### Suspected chorion amnionitis

0 No

1 Yes

9 Doesn't know

#### MOTTRAV\_4

##### Maternal reason

0 No



23 / 05 / 2016

1 Yes  
9 Doesn't know

**MOTTRAV\_5**

**No medical reason**

0 No  
1 Yes  
9 Doesn't know

**MOTTRAV\_6**

**Other**

0 No  
1 Yes  
9 Doesn't know

INT: 2 POSSIBLE REASONS

If MOTTRAV 4=1

**\*MOTTRAVM**

**Specify** \_\_\_\_\_

If MOTTRAV 6=1

**\*MOTTRAVP**

**Specify** \_\_\_\_\_

**ANALG**

**Analgesia**

0 None  
1 Epidural  
2 Spinal anaesthesia  
3 Combined epidural/spinal anaesthesia (or sequential)  
4 General anaesthetic  
5 Other

INT: NOT INCLUDING POST-DELIVERY ANAESTHETICS, SAY THE HIGHEST

ANALG=1

**ANALGP**

**Specify** \_\_\_\_\_

**TYPACC**

**Delivery**

1 Spontaneous vaginal  
2 Forceps, spatulas, vacuum  
3 Caesarean  
9 Doesn't know  
(Question duplicated for twins)

If TYPACC=3

**TYPES**

**Was the caesarean:**

23 / 05 / 2016

- 1 Planned
  - 2 Carried out as an emergency
  - 9 Doesn't know
- (Question duplicated for twins)*

If TYPACC >1 (caesarean or vaginal using instruments)

**MOTCES**

**Reason**

- 1 IUGR or lactate anomaly
- 2 Another foetal indication
- 3 Another maternal indication
- 4 Other
- 9 Doesn't know

INT: 2 POSSIBLE REASONS

*(Question duplicated for twins)*

If MOTCES=4

**\*MOTCESP**

**Specify** \_\_\_\_\_

*(Question duplicated for twins)*

**EPISIO**

**Episiotomy**

- 0 No
- 1 Yes
- 9 Doesn't know

**POIPLAC**

**Weight of placenta (grammes)**

*(Question duplicated for twins)*

|\_|\_|\_|\_|

## CHILD

(Duplicated for twins)

### REA

#### Reanimation in delivery room

- 0 No
- 1 Yes
- 9 Doesn't know

If REA=1

### REAP

#### Reanimation technique

- 1 Bag-mask ventilation
- 2 NeoPuff ventilation
- 3 Nasal CPP
- 4 Intubation
- 9 Doesn't know

### PRLVCORD

#### Umbilical cord sample

- 0 No
- 1 Yes
- 9 Doesn't know

If PRLVCORD=1

### PHCORD

#### pH

\_\_,\_\_

### LACCORD

#### Lactates (mmol/l)

\_\_,\_\_,\_\_

### PRLVPERI

#### Peripheral blood sample

- 0 No
- 1 Yes
- 9 Doesn't know

If PRLVPERI=1

### TPSPERI

#### At what hour of life?

\_\_

### PHPERI

#### pH

\_\_,\_\_

### LACPERI

#### Lactates (mmol/l)

\_\_,\_\_,\_\_

### APGAR1M

#### Apgar at 1 minute

\_\_

**APGAR5M**

**Apgar at 5 minutes**

|\_|\_|

**\*SEXEC1**

*(Select the SEX variable from the FCC maternity unit questionnaire)*

UPD

**Sex (corrected)**

1 Male

2 Female

9 Doesn't know

**POIENF**

**Weight** (grammes)

|\_|\_|\_|\_|

**TAIENF**

**Size** (cm)

|\_|\_|

INT: IF THE MEASUREMENT WAS NOT MADE ON BIRTH, GIVE THE VALUE OF A MEASUREMENT MADE BEFORE LEAVING THE MATERNITY UNIT *(text added in wave 3)*

**PC**

**Cranial perimeter** (cm)

|\_|\_|

INT: IF THE MEASUREMENT WAS NOT MADE ON BIRTH, GIVE THE VALUE OF A MEASUREMENT MADE BEFORE LEAVING THE MATERNITY UNIT *(text added in wave 3)*

**Girl**

**GENIC1**

UPD

**Anomaly with external genital organs (corrected)**

0 No

1 Yes

9 Doesn't know

*If GENI=1*

**\*GENIPC1**

UPD

**Specify (corrected)** \_\_\_\_\_

**Boy**

**TESTICC1**

UPD

**At least one undescended testicle (corrected)**

0 No

1 Yes

9 Doesn't know

**HYOSPC1**

UPD

**Hypospadias (corrected)**

0 No

1 Yes

9 Doesn't know

**MICROPC1**

UPD

**Micropenis (corrected)**

0 No

1 Yes

9 Doesn't know

**GENIAUTC1**

UPD

**Other malformation of external genital organs (corrected)**

0 No

1 Yes

9 Doesn't know

*If GENIAUT=1*

**\*GENIAUTPC1**

UPD

**Specify (corrected)** \_\_\_\_\_

**ANOAUT**

**Other congenital anomaly**

0 No

1 Yes

9 Doesn't know

*If ANOAUT=1*

**\*ANOAUTP Specify** \_\_\_\_\_

**DMATER**

**Maternity death (if live birth)**

0 No

1 Yes

9 Doesn't know

**PHOTOTH**

**Phototherapy**

0 No

1 Yes

9 Doesn't know

*If PHOTOTH=1*

**PHOTOP**

**Type of phototherapy**

1 Intensive

2 Conventional

3 Not documented

**ANTIBIO**

**IV antibiotherapy**

- 0 No
- 1 Yes
- 9 Doesn't know

**GAVAGE**

**Tube feeding**

- 0 No
- 1 Yes
- 9 Doesn't know

**TESTAUD**

**Hearing screening**

- 0 No test
- 1 Otoacoustic emissions (OAEs)
- 2 Automatic auditory evoked potentials (AEPs)
- 3 Not documented

*If TESTAUD=1 or 2*

**RETEST**

**Result:**

- 1 Normal
- 2 Bilateral abnormal
- 3 Unilateral abnormal
- 9 Not documented

**POISORTCONNU**

**Was the child's weight known at the end of the survey period?**

- 0 No
- 1 Yes
- 9 Doesn't know

INT: WAIT UNTIL THE LAST DAY OF THE SURVEY TO ANSWER THIS QUESTION NEGATIVELY IN ORDER TO DOCUMENT THE HIGHEST NUMBER OF EXIT WEIGHTS POSSIBLE

*(Question added in wave 2)*

*If POISORTCONNU=1*

**POISORT**

**Exit weight of child** (grammes)

|\_|\_|\_|\_|

**\*DSORTENF**

**Maternity unit exit date** (child) (dd/mm/yy)

|\_|\_|\_|\_|\_|\_|\_|

*⇒ See end of chapter for corrected variable and constructed variable: Number of days between the child's date of birth and corrected date of leaving maternity unit (child)*

**\*DSORTM**

**Maternity unit exit date** (mother) (dd/mm/yy)

|\_|\_|\_|\_|\_|\_|\_|

*⇒ See end of chapter for corrected variable and constructed variable: Number of days between the child's date of birth and corrected date of leaving maternity unit (mother)*

**HOSPM**

**Particular hospitalisation or transfer of mother**

0 No

1 Yes

9 Doesn't know

*If HOSPM=1*

**HOSPMP**

**Specify:**

1 In reanimation or intensive care for over 24 hours

2 In another unit for maternal medical reason

3 To be with the child

9 Doesn't know

**\*DSORTENFC**

**UPD** Maternity unit exit date (child) (corrected)

|\_|\_|\_|\_|\_|\_|\_|

**DSORTENFJR**

**UPD** (Constructed variable) Number of days between the child's date of birth and maternity unit exit date (corrected) (child)

|\_|

**\*DSORTMC**

**UPD** Maternity unit exit date (mother) (corrected)

|\_|\_|\_|\_|\_|\_|\_|

**DSORTMJR**

**UPD** (Constructed variable) Number of days between the child's date of birth and maternity unit exit date (corrected) (mother)

|\_|

**TRANSFER**  
(Duplicated for twins)

**TRANS**

**Transfer of child**

- 0 No
- 1 Yes
- 9 Doesn't know

**Reason for transfer**

**MOTTRAN\_1**

**Prematurity or hypotrophy**

- 0 No
- 1 Yes
- 9 Doesn't know

**MOTTRAN\_2**

**Respiratory distress**

- 0 No
- 1 Yes
- 9 Doesn't know

**MOTTRAN\_3**

**Suspected infection**

- 0 No
- 1 Yes
- 9 Doesn't know

**MOTTRAN\_4**

**Congenital anomaly**

- 0 No
- 1 Yes
- 9 Doesn't know

**MOTTRAN\_5**

**Other**

- 0 No
- 1 Yes
- 9 Doesn't know

INT: 2 POSSIBLE REASONS

If MOTTRAN\_5=1

**\*MOTTRANP**

**Other reason, specify** \_\_\_\_\_

**ETTRANS**

**Transfer:**

- 1 In same establishment



23 / 05 / 2016

- 2 To another establishment
- 9 Doesn't know

*If ETTRANS=1 (transfer in same establishment)*

**TRMMET**

**To which unit?**

- 1 Reanimation or intensive care
- 2 Neonatal
- 3 Neonatal unit in the maternity unit (including "kangaroo" mother-child units)
- 4 Other
- 9 Doesn't know

*If TRMMET=4*

**\*TRMMETP** Other unit, specify: \_\_\_\_\_

*If ETTRANS=1 (transfer to another establishment)*

**TRAUTET**

**To which unit?**

- 1 Reanimation or intensive care
- 2 Neonatal
- 3 Other
- 9 Doesn't know

*If TRAUTET=3*

**\*TRAUTETP**

Other unit, specify \_\_\_\_\_

→ Child 2 if twins, or end of questionnaire

**TRNBTRANS**

Number of transfers

|\_|\_|

**\*TRD1TRANS**

**Date of arrival at first transfer location**

|\_|\_|\_|\_|\_|\_|\_|\_|

⇒ See end of chapter for the corrected variable and constructed variable: number of days between the child's date of birth and the date of arrival at the first transfer location (corrected)

**TRT1SERV**

**Unit:**

- 1 Reanimation
- 2 Neonatal
- 3 Unit in maternity unit
- 4 Other
- 9 Doesn't know

*If TRT1SERV=9*

**\*TRT1SERVP**

Other unit, specify \_\_\_\_\_

**TRT1NIV**

**Level:**

- 1 Level 1
- 2 Level 2A

- 3 Level 2B
- 4 Level 3
- 9 Doesn't know

**\*TRT1VILLE**

**Town** \_\_\_\_\_

**\*TRDDERTRANS**

**Date of arrival at last transfer location**

|\_|\_|\_|\_|\_|\_|\_|\_|\_|

⇒ See end of chapter for the corrected variable and constructed variable: number of days between the child's date of birth and the date of arrival at the last transfer location (corrected)

**TRDSERV**

**Unit:**

- 1 Reanimation
- 2 Neonatal
- 3 Unit in maternity unit
- 4 Other
- 9 Doesn't know

**\*TRDSERV**

**Other unit, specify:** \_\_\_\_\_

**TRTDNIV**

**Level:**

- 1 Level 1
- 2 Level 2A
- 3 Level 2B
- 4 Level 3
- 9 Doesn't know

**\*TRTDVILLE**

**Town:** \_\_\_\_\_

**\*TRDSORTIE**

**Departure date from last transfer location**

|\_|\_|\_|\_|\_|\_|\_|\_|\_|

⇒ See end of chapter for the corrected variable and constructed variable: number of days between the child's date of birth and the date of departure from the last transfer location (corrected)

**TRDESTI**

**Departure from last transfer location to:**

- 1 Home
- 2 Maternity unit
- 3 Nursery
- 4 Death
- 5 Other
- 9 Doesn't know

*If TRDESTI=5*

**\*TRDESTIP**

Other destination, specify \_\_\_\_\_

*If TRDESTI=4*

**\*TRDECES**

Date of death

|\_|\_|\_|\_|\_|\_|\_|\_|\_|

**\*TRPQDECS**

Cause of death \_\_\_\_\_

**RECAP OF HOSPITAL LOCATIONS**

**TRREANIM**

Reanimation unit:

0 No

1 Yes

9 Doesn't know

**TRDURREA**

Total length of stay (in days):

|\_|\_|

**TRNEONAT**

Neonatal unit:

0 No

1 Yes

9 Doesn't know

**TRNEONMATER**

Neonatal unit in maternity unit:

0 No

1 Yes

9 Doesn't know

**TRCHIRURG**

Surgery:

0 No

1 Yes

9 Doesn't know

**TRAUTSERV**

Other specialised unit:

0 No

1 Yes

9 Doesn't know

**\*TRAUTSERVP**

Other specialised unit, specify \_\_\_\_\_

**TRDECES**

Death:

0 No

1 Yes

9 Doesn't know

**\*TRD1TRANSC**

**UPD** Date of arrival at first transfer location (corrected) |\_|\_|\_|\_|\_|\_|\_|\_|

**TRD1TRANSJR**

**UPD** (Constructed variable) Number of days between the child's date of birth and the date of arrival at the first transfer location (corrected) |\_|\_|

**\*TRDDERTRANSC**

**UPD** Date of arrival at last transfer location (corrected) |\_|\_|\_|\_|\_|\_|\_|\_|

**TRDDERTRANSJR**

**UPD** (Constructed variable) Number of days between the child's date of birth and the date of arrival at the last transfer location (corrected) |\_|\_|

**\*TRDSORTIEC**

**UPD** Departure date from last transfer location (corrected) |\_|\_|\_|\_|\_|\_|\_|\_|

**TRDSORTIEJR**

**UPD** (Constructed variable) Number of days between the child's date of birth and the departure date from the last transfer location (corrected) |\_|\_|

## TRANSFERRED CHILD: PATHOLOGIES

### TRPATHOESP

Respiratory pathology

- 0 No
- 1 Yes
- 9 Doesn't know

*If TRPATHOESP=1*

### TRDETRESP

Respiratory distress of less than 48 hours:

- 0 No
- 1 Yes
- 9 Doesn't know

### TRMBHYAL

Hyaline membrane disease

- 0 No
- 1 Yes
- 9 Doesn't know

### TRINHALMEC

Meconium Aspiration Syndrome:

- 0 No
- 1 Yes
- 9 Doesn't know

### \*TRAUTRESP

Other respiratory pathology, specify \_\_\_\_\_

### TRRADTHOR

Chest X-rays:

- 0 No
- 1 Yes
- 9 Doesn't know

*If TRRADTHOR=1*

### TRNBADTHOR

Number of chest X-rays:

|\_|\_|

### TRTDMTHOR

Chest CT scans:

- 0 No
- 1 Yes
- 9 Doesn't know

*If TRTDMTHOR=1*

### TRNBDMTHOR

Number of chest CT scans:

|\_|\_|

**TRINTUB**

**Intubation:**

- 0 No
- 1 Yes
- 9 Doesn't know

**TRDURVENTIL**

**Total number of days of ventilation (mechanical, infant flow, CPP):**

|\_|\_|

**Specify any details:**

**TRDURVENTMECA**

**Number of days of mechanical ventilation**

|\_|\_|

**TRDURVENTIF**

**Number of days of infant flow**

|\_|\_|

**TRDURVENTPPC**

**Number of days of CPP**

|\_|\_|

**TROXYGEN**

**Oxygen therapy**

- 0 No
- 1 Yes
- 9 Doesn't know

*If TROXYGEN=1*

**TRDUROXYGEN**

**Number of days of oxygen therapy**

|\_|\_|

**\*TRDOXYGEN**

**Date of definitive end of oxygen therapy**

|\_|\_|\_|\_|\_|\_|\_|\_|

*⇒ See end of chapter for the corrected variable and constructed variable: number of days between the child's date of birth and the date of the definitive end of oxygen therapy (corrected)*

**TRINFPRECOG**

**Early infection (72 hours of life or less)**

- 0 No
- 1 Yes
- 9 Not documented

*If TRINFPRECOG=1*

**TRIPGERME**

**Germ identified?**

- 0 No
- 1 Yes
- 9 Not documented

*If TRIPGERME=1*

**TRIPQLGERM**

**Which germ?**

23 / 05 / 2016

- 1 Streptococcus B
- 2 E. Coli
- 3 Other
- 9 Doesn't know

*If TRIPQLGERM=3*

**TRIPQLGERMP**

Other germ, specify \_\_\_\_\_

**TRIPMENING**

**Meningeal infection?**

- 0 No
- 1 Yes
- 9 Doesn't know

**TRINFTARD**

**Late infection (after 72 hours of life)**

- 0 No
- 1 Yes
- 9 Doesn't know

*If TRINFTARD=1*

**TRITGERME**

**Germ identified?**

- 0 No
- 1 Yes
- 9 Doesn't know

*If TRITGERME=1*

**TRITQLGERM**

Specify \_\_\_\_\_

**TRANTIBIOIV**

**IV antibiotherapy**

- 0 No
- 1 Yes
- 9 Doesn't know

*If TRANTIBIOIV=1*

**TRDURANTIBIO**

**Length in days:**

\_\_

**TRICTERE**

**Icterus (treated with phototherapy or exchange transfusion)**

- 0 No
- 1 Yes
- 9 Doesn't know

*If TRICTERE=1*

**TRTXBILIRUB**

**Maximum rate of bilirubin (micromol/L)**

\_\_

**TRAGICTERE**

Rate attained at which age (in days, 00 if under 24 hours)?

\_\_ \_\_

**TRPATHODIG**

Digestive pathology

0 No

1 Yes

9 Doesn't know

*If TRPATHODIG=1*

**\*TRPATHODIGP**

Specify \_\_\_\_\_

**TRRADABDO**

Abdomen X-rays without preparation:

0 No

1 Yes

9 Doesn't know

*If TRRADABDO=1*

**TRNBRADABDO**

Specify the number:

\_\_ \_\_

**TRTDMABDO**

Abdomen CT scan

0 No

1 Yes

9 Doesn't know

*If TRTDMABDO=1*

**TRNBTDMA BDO**

Specify the number:

\_\_ \_\_

**TRANOCHROM**

Chromosomal malformation or anomaly

0 No

1 Yes

9 Doesn't know

*If TRANOCHROM=1*

**TRCARYOTYP**

Karyotype required

0 No

1 Yes

9 Doesn't know

*If TRCARYOTYP=1*

**TRRESCARYO**

Result:

1 Pending

2 Normal

3 Abnormal



23 / 05 / 2016

9 Doesn't know

*If TRRESCARYO=1*

**\*TRRESCARYOP**

Describe the anomaly in detail \_\_\_\_\_

**TRNEURO**

Neurological anomaly or pathology

0 No

1 Yes

9 Doesn't know

*If TRNEURO=1*

**TRENCEPHALO**

Encephalopathy

0 No

1 Yes

9 Doesn't know

*If TRENCEPHALO=1*

**TRENCEPHALOP**

Stage (1, 2 or 3):

|\_ |

**TRECHOTF**

Cranial ultrasound

0 No

1 Yes

9 Doesn't know

**TRHEMORRIV**

Intra-ventricular haemorrhage

0 No

1 IVH I

2 IVH II

3 IVH III

4 IVH IV

9 Doesn't know

**TRLEUCOM**

Leukomalacia

0 No

1 Hyperechogenicity > 14 days

2 Cavitary

9 Doesn't know

**TRDILATVENT**

Ventricular dilatation

0 No

1 Yes

9 Doesn't know

**TRTDMCER**

**Brain CT scan**

- 0 No
- 1 Yes
- 9 Doesn't know

*If TRTDMCER=1*

**TRNBDMCER**

**Specify the number:**

|||

**TRRESTDMCER**

**Result:**

- 0 Normal
- 1 Abnormal
- 9 Doesn't know

*If TRTDMCER=1*

**\*TRTDMCERP**

**Specify the anomaly:** \_\_\_\_\_

**TRIRM CER**

**Brain MRIs**

- 0 No
- 1 Yes
- 9 Doesn't know

*If TRIRM CER=1*

**TRNBIRM CER**

**Specify the number:**

|||

**TRRESIRM CER**

**Result:**

- 1 Normal
- 2 Abnormal
- 9 Doesn't know

*If TRRESIRM CER=2*

**\*TRRESIRM CERP** **Specify the anomaly** \_\_\_\_\_

**\*TRPATHO OBST**

**Specify** \_\_\_\_\_

**T RRADAUT**

**X-ray performed**

- 0 No
- 1 Yes
- 9 Doesn't know

*If T RRADAUT=1*

**T RRADLOC** **Specify location** \_\_\_\_\_

**TRTDMAUT**

**CT scan performed**

23 / 05 / 2016

- 0 No
- 1 Yes
- 9 Doesn't know

*If TRDMAUT=1*

**TRDMLLOC** Specify location \_\_\_\_\_

**TRIRMAUT**

**MRI performed**

- 0 No
- 1 Yes
- 9 Doesn't know

*If TRIRMAUT=1*

**TRIRMLOC** Specify location \_\_\_\_\_

**\*TRDOXYGENC**

 **Date of definitive end of oxygen therapy (corrected)**

|\_|\_|\_|\_|\_|\_|\_|\_|\_|

**TRDOXYGENJR**

 **Number of days between the child's date of birth and the definitive end of oxygen therapy (corrected)**

|\_|\_|

## TRANSFERRED CHILD: FEEDING AND OTHER INFORMATION

### TRJDEBALIM

Start of feeding, specify which day of life:

\_\_ \_\_

### TRCATHOMB

Umbilical venous catheter

0 No

1 Yes

9 Doesn't know

### TRCATHCENT

Central catheter

0 No

1 Yes

9 Doesn't know

*If TRCATHCENT=1*

### TRDURCATHC

Number of days:

\_\_ \_\_

### TRRADPOSEC

Inspection X-rays for fitting catheter:

0 No

1 Yes

9 Doesn't know

*If TRRADPOSEC=1*

### TRNBRADPOSEC

Number of X-rays:

\_\_ \_\_

### TRGAVAGE

Gastric force-feeding

0 No

1 Yes

9 Doesn't know

*If TRGAVAGE=1*

### TRDURGAVAGE

Number of days:

\_\_ \_\_

### TRLAITMAT

Mother's milk:

0 No

1 Yes

9 Doesn't know

### TRLAITPA

Initial milk:

0 No

23 / 05 / 2016

- 1 Yes
- 9 Doesn't know

**TRLAITAUT**

**Other:**

- 0 No
- 1 Yes
- 9 Doesn't know

**TRTESTAUD**

**Hearing screening**

- 0 No test
- 1 Otoacoustic emissions (OAEs)
- 2 Automatic auditory evoked potentials (AEPs)
- 9 Not documented

*If TRTESTAUD=1 or 2*

**TRRESTEST**

**Result:**

- 1 Normal
- 2 Bilateral abnormal
- 3 Unilateral abnormal
- 9 Doesn't know

**TRMEREENF**

**Mother present with her child:**

- 1 Every day or almost
- 2 A few days a week
- 3 Once a week
- 4 Less than once a week
- 9 Doesn't know

**TRPOISORT**

**Child's weight at departure (grammes):**

|\_|\_|\_|\_|

**TRPCSORT**

**Cranial perimeter at departure (cm):**

|\_|\_|\_|\_|

**END**
